# Supplementary material for: Polar polymorphism: α- and β-KCsWP2O9nonlinear optical materials with a strong second harmonic generation response
Source: Royal Society of Chemistry journal article supplement (doi:10.1039/d0tc02753g), 2020-01-01
Supplement: d0tc02753g1.pdf [file d0tc02753g1.pdf]

**Electronic Supporting Information**

**Polar Polymorphism:  $\alpha$ -, and  $\beta$ -KCsWP<sub>2</sub>O<sub>9</sub> Nonlinear Optical Materials with Strong Second Harmonic Generation Response**

Tuohetijiang Baiheti,<sup>a,b,#</sup> Shujuan Han,<sup>a,b,#</sup> Abudukadi Tudi,<sup>a,b</sup> Zhihua Yang,<sup>a,b</sup> and Shilie Pan<sup>\*a,b</sup>

<sup>a</sup> CAS Key Laboratory of Functional Materials and Devices for Special Environments, Xinjiang Technical Institute of Physics & Chemistry, CAS; Xinjiang Key Laboratory of Electronic Information Materials and Devices, 40-1 South Beijing Road, Urumqi 830011, China.

<sup>b</sup> Center of Materials Science and Optoelectronics Engineering, University of Chinese Academy of Sciences, Beijing 100049, China.

Fax:(86)-991-3838957; Tel: (86)-991-3674558.

To whom correspondence should be addressed:

E-mail: slpan@ms.xjb.ac.cn (Shilie Pan).

**Table 1(a).** Crystal data and structure refinements for  $\alpha$ - and  $\beta$ -KCsWP<sub>2</sub>O<sub>9</sub>.

| Empirical formula                                                  | $\alpha$ -KCsWP <sub>2</sub> O <sub>9</sub>                | $\beta$ -KCsWP <sub>2</sub> O <sub>9</sub>                 |
|--------------------------------------------------------------------|------------------------------------------------------------|------------------------------------------------------------|
| Formula weight                                                     | 561.80                                                     | 561.80                                                     |
| Crystal system                                                     | Trigonal                                                   | Hexagonal                                                  |
| Space group, Z                                                     | <i>P</i> 3 <sub>2</sub> , 3                                | <i>P</i> 6 <sub>1</sub> , 6                                |
| Unit cell dimensions (Å)                                           | <i>a</i> = 8.501(6)<br><i>c</i> = 10.940(19)               | <i>a</i> = 8.464(11)<br><i>c</i> = 21.882(19)              |
| Volume (Å <sup>3</sup> )                                           | 684.82(13)                                                 | 1357.9(5)                                                  |
| Density (calc) (g/cm <sup>3</sup> )                                | 4.087                                                      | 4.122                                                      |
| $\theta$ range for data collection (deg)                           | 1.861-27.488                                               | 2.779-27.214                                               |
| Limiting indices                                                   | $11 \leq h \leq 11, -11 \leq k \leq 9, -14 \leq l \leq 14$ | $-10 \leq h \leq 7, -9 \leq k \leq 10, -27 \leq l \leq 28$ |
| Reflections collected/unique                                       | 4234/2061 [R(int) = 0.0316]                                | 8167/1997 [R(int) = 0.0574]                                |
| Completeness (%)                                                   | 99.9                                                       | 100                                                        |
| Goodness of fit on $F_o^2$                                         | 0.833                                                      | 0.935                                                      |
| Final <i>R</i> indices [ $F_o^2 > 2\sigma(F_o^2)$ ] <sup>[a]</sup> | $R_1 = 0.0248, wR_2 = 0.0490$                              | $R_1 = 0.0327, wR_2 = 0.0633$                              |
| <i>R</i> indices (all data) <sup>[a]</sup>                         | $R_1 = 0.0254, wR_2 = 0.0492$                              | $R_1 = 0.0433, wR_2 = 0.0672$                              |
| Largest diff. peak and hole (e/Å <sup>3</sup> )                    | 1.115 and -0.800                                           | 0.864 and -1.162                                           |
| Absolute structure parameter                                       | -0.002(9)                                                  | 0.025(11)                                                  |

<sup>[a]</sup> $R_1 = \sum ||F_o| - |F_c|| / \sum |F_o|$  and  $wR_2 = [\sum w(F_o^2 - F_c^2)^2 / \sum wF_o^4]^{1/2}$  for  $F_o^2 > 2\sigma(F_o^2)$ .

**Table S1(b).** The final Atomic coordinates ( $\times 10^4$ ) and equivalent isotropic displacement parameters ( $\text{\AA}^2 \times 10^3$ ) for  $\alpha$ -, and  $\beta$ -KCsWP<sub>2</sub>O<sub>9</sub>,  $U_{\text{eq}}$  is defined as one-third of the trace of the orthogonalized  $U_{ij}$  tensor, and the bond valence sum for each atom in asymmetric unit.

| $\alpha$ -KCsWP <sub>2</sub> O <sub>9</sub> ( $P3_2$ ) |           |           |          |       |       |
|--------------------------------------------------------|-----------|-----------|----------|-------|-------|
| Atom                                                   | x         | y         | z        | U(eq) | BVS   |
| K(1)                                                   | 781(5)    | 145(5)    | 2434(3)  | 29(1) | 1.155 |
| Cs(1)                                                  | 5210(2)   | -32(2)    | 4000(1)  | 33(1) | 0.907 |
| W(1)                                                   | 5094(1)   | 4989(1)   | 3718(1)  | 13(1) | 6.308 |
| P(1)                                                   | -745(5)   | -4076(5)  | 4162(3)  | 15(1) | 5.146 |
| P(2)                                                   | 855(4)    | 3653(5)   | 4288(3)  | 14(1) | 5.132 |
| O(1)                                                   | 5801(14)  | 6726(13)  | 4757(8)  | 23(2) | 2.130 |
| O(2)                                                   | 4468(16)  | 3170(14)  | 4660(9)  | 30(3) | 1.941 |
| O(3)                                                   | 2609(13)  | 4553(15)  | 3504(8)  | 25(2) | 2.079 |
| O(4)                                                   | -2391(14) | -4501(17) | 3375(9)  | 30(3) | 2.136 |
| O(5)                                                   | 788(15)   | -2228(14) | 3941(10) | 34(3) | 1.908 |
| O(6)                                                   | -1248(13) | -4487(13) | 5491(8)  | 19(2) | 2.012 |
| O(7)                                                   | -150(15)  | 1692(13)  | 4151(10) | 31(2) | 2.148 |
| O(8)                                                   | 1233(13)  | 4364(12)  | 5589(8)  | 16(2) | 1.928 |
| O(9)                                                   | -313(14)  | 4419(15)  | 3650(10) | 20(2) | 2.198 |

| $\beta$ -KCsWP <sub>2</sub> O <sub>9</sub> ( $P6_1$ ) |          |          |         |       |       |
|-------------------------------------------------------|----------|----------|---------|-------|-------|
| Atom                                                  | x        | y        | z       | U(eq) | BVS   |
| K(1)                                                  | 9575(6)  | 9710(7)  | 4221(2) | 56(2) | 1.218 |
| Cs(1)                                                 | 10122(2) | 5082(2)  | 5030(1) | 32(1) | 0.963 |
| W(1)                                                  | 5051(1)  | 255(1)   | 4893(1) | 18(1) | 6.290 |
| P(1)                                                  | 5881(6)  | 6903(6)  | 5144(2) | 21(1) | 5.135 |
| P(2)                                                  | 3601(6)  | 3032(6)  | 5141(2) | 22(1) | 5.118 |
| O(1)                                                  | 7732(16) | 7175(18) | 5030(6) | 44(3) | 2.010 |
| O(2)                                                  | 5531(17) | 8226(15) | 4761(5) | 34(3) | 2.124 |
| O(3)                                                  | 5450(14) | 6919(14) | 5803(5) | 22(2) | 2.032 |
| O(4)                                                  | 4307(17) | 5026(13) | 4874(7) | 29(3) | 2.257 |
| O(5)                                                  | 1610(15) | 1997(17) | 5052(6) | 41(3) | 2.088 |
| O(6)                                                  | 4629(17) | 2341(15) | 4751(4) | 32(3) | 2.107 |
| O(7)                                                  | 4239(13) | 3245(13) | 5800(5) | 20(2) | 1.892 |
| O(8)                                                  | 3237(15) | -884(15) | 5382(5) | 28(3) | 2.032 |
| O(9)                                                  | 6798(15) | 1375(16) | 5397(5) | 31(3) | 2.105 |

**Table S2.** Selected bond distances (Å) and angles (deg) for  $\alpha$ -, and  $\beta$ -KCsWP<sub>2</sub>O<sub>9</sub>.

| $\alpha$ -KCsWP <sub>2</sub> O <sub>9</sub> ( <i>P</i> 3 <sub>2</sub> ) |           |                     |            |
|-------------------------------------------------------------------------|-----------|---------------------|------------|
| Cs(1)-O(1)#3                                                            | 3.150(10) | K(1)-O(7)#4         | 2.617(11)  |
| Cs(1)-O(1)#1                                                            | 3.158(9)  | W(1)-O(1)           | 1.717(10)  |
| Cs(1)-O(2)                                                              | 3.170(10) | W(1)-O(2)           | 1.707(10)  |
| Cs(1)-O(2)#1                                                            | 3.189(10) | W(1)-O(3)           | 1.968(9)   |
| Cs(1)-O(4)#2                                                            | 3.677(10) | W(1)-O(4)#7         | 1.994(10)  |
| Cs(1)-O(5)                                                              | 3.256(11) | W(1)-O(6)#4         | 2.151(9)   |
| Cs(1)-O(6)#4                                                            | 3.726(10) | W(1)-O(8)#8         | 2.142(9)   |
| Cs(1)-O(7)#5                                                            | 3.458(11) | P(1)-O(4)           | 1.524(10)  |
| Cs(1)-O(8)#1                                                            | 3.415(9)  | P(1)-O(5)           | 1.476(11)  |
| Cs(1)-O(9)#6                                                            | 3.321(11) | P(1)-O(6)           | 1.507(10)  |
| K(1)-O(1)#1                                                             | 2.911(10) | P(1)-O(9)#3         | 1.598(11)  |
| K(1)-O(5)                                                               | 2.608(11) | P(2)-O(3)           | 1.550(10)  |
| K(1)-O(5)#4                                                             | 2.908(12) | P(2)-O(7)           | 1.452(10)  |
| K(1)-O(6)#4                                                             | 2.942(10) | P(2)-O(8)           | 1.517(9)   |
| K(1)-O(7)                                                               | 2.632(11) | P(2)-O(9)           | 1.596(12)  |
| O(1)#3-Cs(1)-O(1)#1                                                     | 108.4(3)  | O(2)-Cs(1)-O(5)     | 80.1(3)    |
| O(1)#3-Cs(1)-O(2)#1                                                     | 108.8(3)  | O(2)#1-Cs(1)-O(5)   | 110.8(3)   |
| O(1)#1-Cs(1)-O(2)#1                                                     | 49.3(2)   | O(2)-Cs(1)-O(6)#4   | 45.9(2)    |
| O(1)#3-Cs(1)-O(2)                                                       | 151.5(2)  | O(2)#1-Cs(1)-O(6)#4 | 56.1(2)    |
| O(1)#1-Cs(1)-O(2)                                                       | 96.1(2)   | O(2)-Cs(1)-O(7)#5   | 107.4(3)   |
| O(1)#3-Cs(1)-O(4)#2                                                     | 87.3(3)   | O(2)#1-Cs(1)-O(7)#5 | 72.2(3)    |
| O(1)#1-Cs(1)-O(4)#2                                                     | 162.9(2)  | O(2)-Cs(1)-O(8)#1   | 158.9(2)   |
| O(1)#1-Cs(1)-O(5)                                                       | 62.1(3)   | O(2)#1-Cs(1)-O(8)#1 | 64.4(2)    |
| O(1)#3-Cs(1)-O(5)                                                       | 98.5(3)   | O(2)#1-Cs(1)-O(9)#6 | 157.0(3)   |
| O(1)#3-Cs(1)-O(6)#4                                                     | 162.5(2)  | O(2)-Cs(1)-O(9)#6   | 67.3(3)    |
| O(1)#1-Cs(1)-O(6)#4                                                     | 55.7(2)   | O(4)#2-Cs(1)-O(6)#4 | 107.7(2)   |
| O(1)#3-Cs(1)-O(7)#5                                                     | 73.2(2)   | O(5)-Cs(1)-O(4)#2   | 123.5(3)   |
| O(1)#1-Cs(1)-O(7)#5                                                     | 119.4(3)  | O(5)-Cs(1)-O(6)#4   | 81.0(2)    |
| O(1)#1-Cs(1)-O(8)#1                                                     | 63.9(2)   | O(5)-Cs(1)-O(7)#5   | 171.6(2)   |
| O(1)#3-Cs(1)-O(8)#1                                                     | 49.2(2)   | O(5)-Cs(1)-O(8)#1   | 94.8(3)    |
| O(1)#1-Cs(1)-O(9)#6                                                     | 145.7(3)  | O(5)-Cs(1)-O(9)#6   | 85.0(3)    |
| O(1)#3-Cs(1)-O(9)#6                                                     | 84.2(3)   | O(7)#5-Cs(1)-O(4)#2 | 57.8(3)    |
| O(2)-Cs(1)-O(2)#1                                                       | 98.1(3)   | O(7)#5-Cs(1)-O(6)#4 | 106.8(2)   |
| O(2)-Cs(1)-O(4)#2                                                       | 70.7(3)   | O(8)#1-Cs(1)-O(4)#2 | 127.4(2)   |
| O(2)#1-Cs(1)-O(4)#2                                                     | 120.2(2)  | O(8)#1-Cs(1)-O(6)#4 | 113.23(19) |
| O(8)#1-Cs(1)-O(7)#5                                                     | 79.3(2)   | O(2)-W(1)-O(1)      | 101.3(4)   |
| O(9)#6-Cs(1)-O(4)#2                                                     | 39.4(3)   | O(2)-W(1)-O(3)      | 94.7(5)    |
| O(9)#6-Cs(1)-O(6)#4                                                     | 113.1(2)  | O(2)-W(1)-O(4)#7    | 97.2(5)    |
| O(9)#6-Cs(1)-O(7)#5                                                     | 94.5(3)   | O(2)-W(1)-O(6)#4    | 89.7(4)    |
| O(9)#6-Cs(1)-O(8)#1                                                     | 133.0(2)  | O(2)-W(1)-O(8)#8    | 168.6(4)   |
| O(1)#1-K(1)-O(6)#4                                                      | 67.6(3)   | O(3)-W(1)-O(4)#7    | 162.3(3)   |

|                    |            |                    |          |
|--------------------|------------|--------------------|----------|
| O(5)-K(1)-O(1)#1   | 73.4(3)    | O(3)-W(1)-O(6)#4   | 84.9(4)  |
| O(5)#4-K(1)-O(1)#1 | 86.2(3)    | O(3)-W(1)-O(8)#8   | 82.1(4)  |
| O(5)-K(1)-O(5)#4   | 156.9(2)   | O(4)#7-W(1)-O(6)#4 | 82.0(4)  |
| O(5)-K(1)-O(6)#4   | 109.9(3)   | O(4)#7-W(1)-O(8)#8 | 83.7(4)  |
| O(5)#4-K(1)-O(6)#4 | 50.5(3)    | O(8)#8-W(1)-O(6)#4 | 79.1(3)  |
| O(5)-K(1)-O(7)#4   | 103.9(4)   | O(4)-P(1)-O(9)#3   | 99.4(6)  |
| O(5)-K(1)-O(7)     | 93.0(4)    | O(5)-P(1)-O(4)     | 112.2(7) |
| O(7)#4-K(1)-O(1)#1 | 91.0(3)    | O(5)-P(1)-O(6)     | 113.7(6) |
| O(7)-K(1)-O(1)#1   | 151.1(3)   | O(5)-P(1)-O(9)#3   | 111.1(6) |
| O(7)-K(1)-O(5)#4   | 100.2(4)   | O(6)-P(1)-O(4)     | 111.7(6) |
| O(7)#4-K(1)-O(5)#4 | 86.8(3)    | O(6)-P(1)-O(9)#3   | 107.7(6) |
| O(7)#4-K(1)-O(6)#4 | 131.6(3)   | O(3)-P(2)-O(9)     | 101.4(6) |
| O(7)-K(1)-O(6)#4   | 94.7(3)    | O(7)-P(2)-O(3)     | 112.2(6) |
| O(7)#4-K(1)-O(7)   | 117.37(15) | O(7)-P(2)-O(8)     | 116.1(6) |
| O(1)-W(1)-O(3)     | 97.0(5)    | O(7)-P(2)-O(9)     | 107.1(6) |
| O(1)-W(1)-O(4)#7   | 93.5(5)    | O(8)-P(2)-O(3)     | 111.3(6) |
| O(1)-W(1)-O(6)#4   | 168.6(4)   | O(8)-P(2)-O(9)     | 107.4(5) |
| O(1)-W(1)-O(8)#8   | 90.0(4)    |                    |          |

Symmetry transformations used to generate equivalent atoms:

#1 -y+1,x-y,z-1/3    #2 -x+y+1,-x,z+1/3    #3 x,y-1,z    #4 -y,x-y,z-1/3  
 #5 x+1,y,z    #6 -x+y,-x,z+1/3    #7 x+1,y+1,z    #8 -y+1,x-y+1,z-1/3  
 #9 -x+y+1,-x+1,z+1/3    #10 x,y+1,z    #11 -y,x-y-1,z-1/3    #12 x-1,y,z  
 #13 x-1,y-1,z    #14 -x+y,-x+1,z+1/3

$\beta$ -KCsWP<sub>2</sub>O<sub>9</sub> (P6<sub>1</sub>)

|                    |           |                     |           |
|--------------------|-----------|---------------------|-----------|
| W(1)-O(2)#3        | 1.974(11) | Cs(1)-O(9)#7        | 3.137(11) |
| W(1)-O(3)#4        | 2.162(10) | K(1)-O(1)#9         | 2.691(14) |
| W(1)-O(6)          | 1.993(10) | K(1)-O(1)           | 2.612(13) |
| W(1)-O(7)#4        | 2.146(10) | K(1)-O(2)           | 3.224(13) |
| W(1)-O(8)          | 1.718(11) | K(1)-O(3)#9         | 3.264(12) |
| W(1)-O(9)          | 1.704(10) | K(1)-O(5)#8         | 2.585(13) |
| Cs(1)-O(1)         | 3.289(12) | K(1)-O(5)#7         | 2.589(13) |
| Cs(1)-O(3)#4       | 3.497(10) | K(1)-O(8)#7         | 3.260(12) |
| Cs(1)-O(4)#5       | 3.583(13) | P(1)-O(1)           | 1.486(12) |
| Cs(1)-O(4)#6       | 3.376(15) | P(1)-O(2)           | 1.541(11) |
| Cs(1)-O(5)#5       | 3.420(13) | P(1)-O(3)           | 1.490(11) |
| Cs(1)-O(6)#6       | 3.665(10) | P(1)-O(4)           | 1.591(12) |
| Cs(1)-O(7)#7       | 3.618(10) | P(2)-O(4)           | 1.594(11) |
| Cs(1)-O(8)#8       | 3.195(11) | P(2)-O(5)           | 1.473(12) |
| Cs(1)-O(8)#7       | 3.166(11) | P(2)-O(6)           | 1.529(11) |
| Cs(1)-O(9)         | 3.095(11) | P(2)-O(7)           | 1.518(11) |
| O(2)#3-W(1)-O(3)#4 | 83.2(4)   | O(4)#6-Cs(1)-O(5)#5 | 87.7(3)   |

---

|                     |          |                     |          |
|---------------------|----------|---------------------|----------|
| O(2)#3-W(1)-O(6)    | 162.6(4) | O(4)#6-Cs(1)-O(6)#6 | 40.2(2)  |
| O(2)#3-W(1)-O(7)#4  | 82.2(4)  | O(4)#5-Cs(1)-O(6)#6 | 61.8(3)  |
| O(6)-W(1)-O(3)#4    | 82.6(4)  | O(4)#5-Cs(1)-O(7)#7 | 71.8(2)  |
| O(6)-W(1)-O(7)#4    | 85.2(4)  | O(4)#6-Cs(1)-O(7)#7 | 134.1(3) |
| O(7)#4-W(1)-O(3)#4  | 79.2(4)  | O(5)#5-Cs(1)-O(3)#4 | 76.2(3)  |
| O(8)-W(1)-O(2)#3    | 96.8(5)  | O(5)#5-Cs(1)-O(4)#5 | 41.2(2)  |
| O(8)-W(1)-O(3)#4    | 168.5(5) | O(5)#5-Cs(1)-O(6)#6 | 60.9(3)  |
| O(8)-W(1)-O(6)      | 95.1(5)  | O(5)#5-Cs(1)-O(7)#7 | 109.2(3) |
| O(8)-W(1)-O(7)#4    | 89.4(4)  | O(7)#7-Cs(1)-O(6)#6 | 111.8(2) |
| O(9)-W(1)-O(2)#3    | 94.5(5)  | O(8)#7-Cs(1)-O(1)   | 65.3(3)  |
| O(9)-W(1)-O(3)#4    | 90.4(4)  | O(8)#8-Cs(1)-O(1)   | 79.9(3)  |
| O(9)-W(1)-O(6)      | 95.7(5)  | O(8)#8-Cs(1)-O(3)#4 | 159.1(2) |
| O(9)-W(1)-O(7)#4    | 169.3(5) | O(8)#7-Cs(1)-O(3)#4 | 60.4(3)  |
| O(9)-W(1)-O(8)      | 101.1(5) | O(8)#8-Cs(1)-O(4)#5 | 75.2(3)  |
| O(1)-Cs(1)-O(3)#4   | 93.1(3)  | O(8)#8-Cs(1)-O(4)#6 | 87.3(3)  |
| O(1)-Cs(1)-O(4)#6   | 88.7(3)  | O(8)#7-Cs(1)-O(4)#6 | 151.4(3) |
| O(1)-Cs(1)-O(4)#5   | 152.3(3) | O(8)#7-Cs(1)-O(4)#5 | 106.8(3) |
| O(1)-Cs(1)-O(5)#5   | 166.4(3) | O(8)#8-Cs(1)-O(5)#5 | 113.0(3) |
| O(1)-Cs(1)-O(6)#6   | 122.1(3) | O(8)#7-Cs(1)-O(5)#5 | 114.6(3) |
| O(1)-Cs(1)-O(7)#7   | 82.5(3)  | O(8)#7-Cs(1)-O(6)#6 | 167.6(3) |
| O(3)#4-Cs(1)-O(4)#5 | 105.9(3) | O(8)#8-Cs(1)-O(6)#6 | 73.9(3)  |
| O(3)#4-Cs(1)-O(6)#6 | 125.5(3) | O(8)#8-Cs(1)-O(7)#7 | 46.8(3)  |
| O(3)#4-Cs(1)-O(7)#7 | 113.0(3) | O(8)#7-Cs(1)-O(7)#7 | 57.5(3)  |
| O(4)#6-Cs(1)-O(3)#4 | 112.4(3) | O(8)#7-Cs(1)-O(8)#8 | 99.1(4)  |
| O(4)#6-Cs(1)-O(4)#5 | 101.8(3) | O(9)-Cs(1)-O(1)     | 93.1(3)  |
| O(9)#7-Cs(1)-O(1)   | 114.5(3) | O(2)-K(1)-O(8)#7    | 99.3(3)  |
| O(9)#7-Cs(1)-O(3)#4 | 62.7(3)  | O(5)#7-K(1)-O(1)    | 137.9(4) |
| O(9)-Cs(1)-O(3)#4   | 49.0(2)  | O(5)#8-K(1)-O(1)    | 92.2(4)  |
| O(9)-Cs(1)-O(4)#5   | 114.5(3) | O(5)#8-K(1)-O(1)#9  | 138.2(4) |
| O(9)#7-Cs(1)-O(4)#5 | 60.5(3)  | O(5)#7-K(1)-O(1)#9  | 90.4(4)  |
| O(9)-Cs(1)-O(4)#6   | 63.4(3)  | O(5)#8-K(1)-O(2)    | 102.3(4) |
| O(9)#7-Cs(1)-O(4)#6 | 156.0(3) | O(5)#7-K(1)-O(2)    | 156.1(4) |
| O(9)-Cs(1)-O(5)#5   | 73.6(3)  | O(5)#7-K(1)-O(3)#9  | 120.6(4) |
| O(9)#7-Cs(1)-O(5)#5 | 68.3(3)  | O(5)#8-K(1)-O(3)#9  | 92.9(4)  |
| O(9)#7-Cs(1)-O(6)#6 | 121.0(3) | O(5)#8-K(1)-O(5)#7  | 100.0(3) |
| O(9)-Cs(1)-O(6)#6   | 85.8(3)  | O(5)#7-K(1)-O(8)#7  | 70.6(4)  |
| O(9)-Cs(1)-O(7)#7   | 161.5(2) | O(5)#8-K(1)-O(8)#7  | 133.4(4) |
| O(9)#7-Cs(1)-O(7)#7 | 59.5(3)  | O(8)#7-K(1)-O(3)#9  | 131.9(3) |
| O(9)-Cs(1)-O(8)#7   | 104.3(3) | O(1)-P(1)-O(2)      | 111.5(7) |
| O(9)#7-Cs(1)-O(8)#7 | 49.6(3)  | O(1)-P(1)-O(3)      | 113.9(7) |
| O(9)-Cs(1)-O(8)#8   | 150.1(3) | O(1)-P(1)-O(4)      | 112.6(7) |
| O(9)#7-Cs(1)-O(8)#8 | 102.1(3) | O(2)-P(1)-O(4)      | 98.9(6)  |
| O(9)-Cs(1)-O(9)#7   | 107.2(4) | O(3)-P(1)-O(2)      | 112.5(6) |
| O(1)-K(1)-O(1)#9    | 106.7(3) | O(3)-P(1)-O(4)      | 106.4(7) |

---

---

|                    |         |                |          |
|--------------------|---------|----------------|----------|
| O(1)#9-K(1)-O(2)   | 67.3(3) | O(5)-P(2)-O(4) | 107.0(7) |
| O(1)-K(1)-O(2)     | 49.4(3) | O(5)-P(2)-O(6) | 113.5(7) |
| O(1)#9-K(1)-O(3)#9 | 48.4(3) | O(5)-P(2)-O(7) | 115.5(7) |
| O(1)-K(1)-O(3)#9   | 98.5(3) | O(6)-P(2)-O(4) | 102.5(7) |
| O(1)#9-K(1)-O(8)#7 | 88.3(3) | O(7)-P(2)-O(4) | 107.5(7) |
| O(1)-K(1)-O(8)#7   | 71.8(4) | O(7)-P(2)-O(6) | 109.8(6) |
| O(2)-K(1)-O(3)#9   | 50.1(3) |                |          |

---

Symmetry transformations used to generate equivalent atoms:

#1  $x-y, x-1, z+1/6$     #2  $x-1, y-1, z$     #3  $x, y-1, z$     #4  $y, -x+y, z-1/6$     #5  $x+1, y, z$   
#6  $x-y+1, x, z+1/6$     #7  $y+1, -x+y+1, z-1/6$     #8  $x+1, y+1, z$     #9  $y, -x+y+1, z-1/6$   
#10  $x-1, y, z$     #11  $x, y+1, z$     #12  $x-y, x, z+1/6$

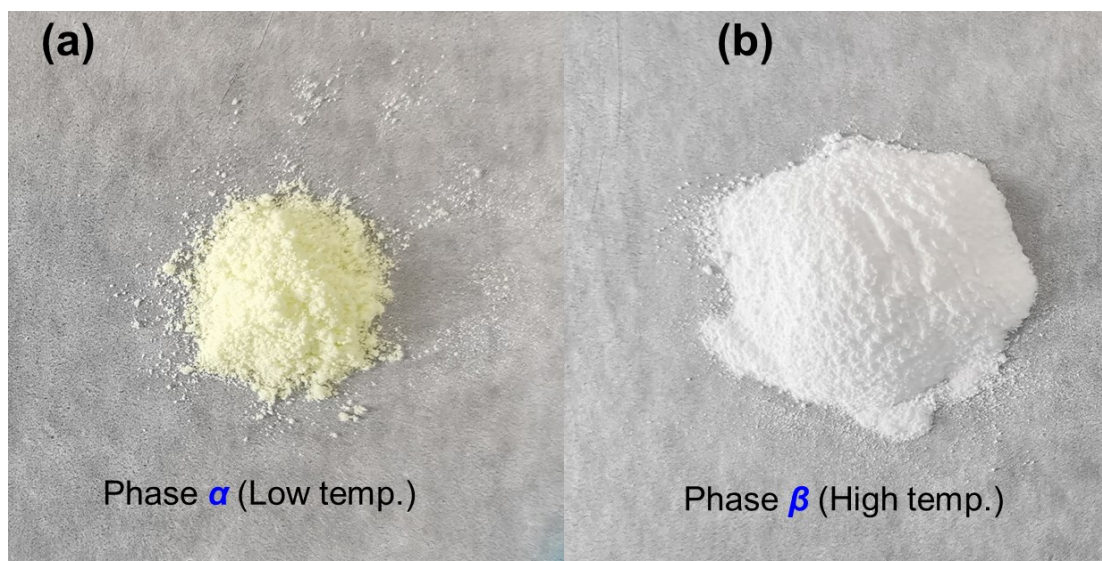

**Figure S1.** The photographs of powder samples of  $\alpha$ -, and  $\beta$ -KCsWP<sub>2</sub>O<sub>9</sub>.



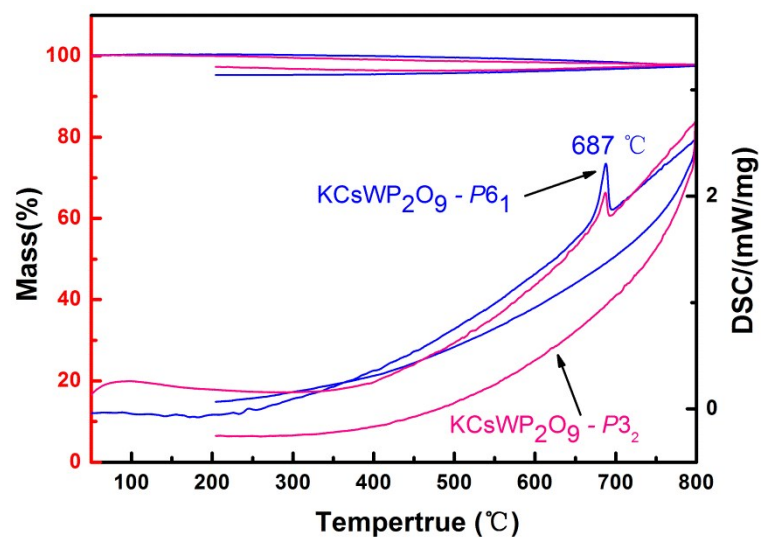

**Figure S2.** The TG-DSC curves of polycrystalline e samples of  $\alpha$ -, and  $\beta$ - $\text{KCsWP}_2\text{O}_9$ .

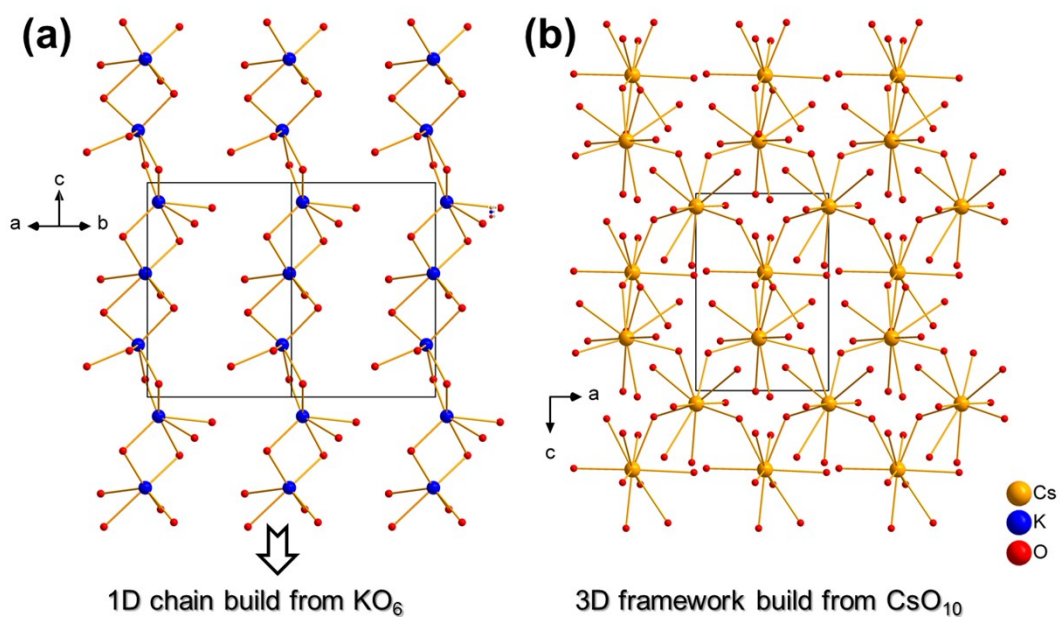

**Figure S3.** Cation coordination environments of K, and Cs atoms in  $\alpha\text{-KCsWP}_2\text{O}_9$ .

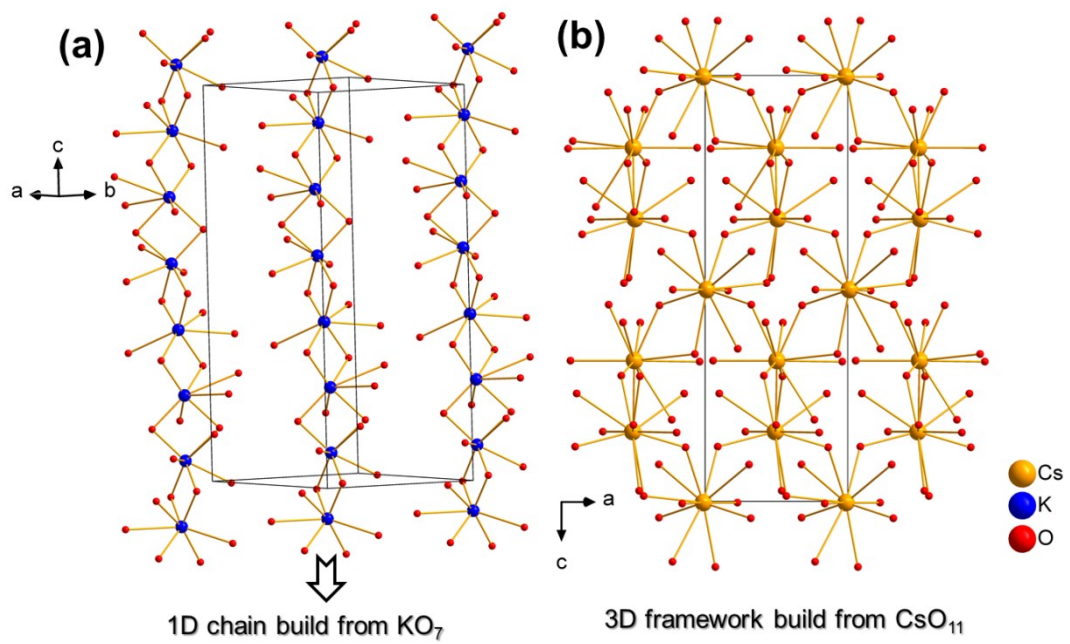

**Figure S4.** Cation coordination environments of K, and Cs atoms in  $\beta\text{-KCsWP}_2\text{O}_9$ .

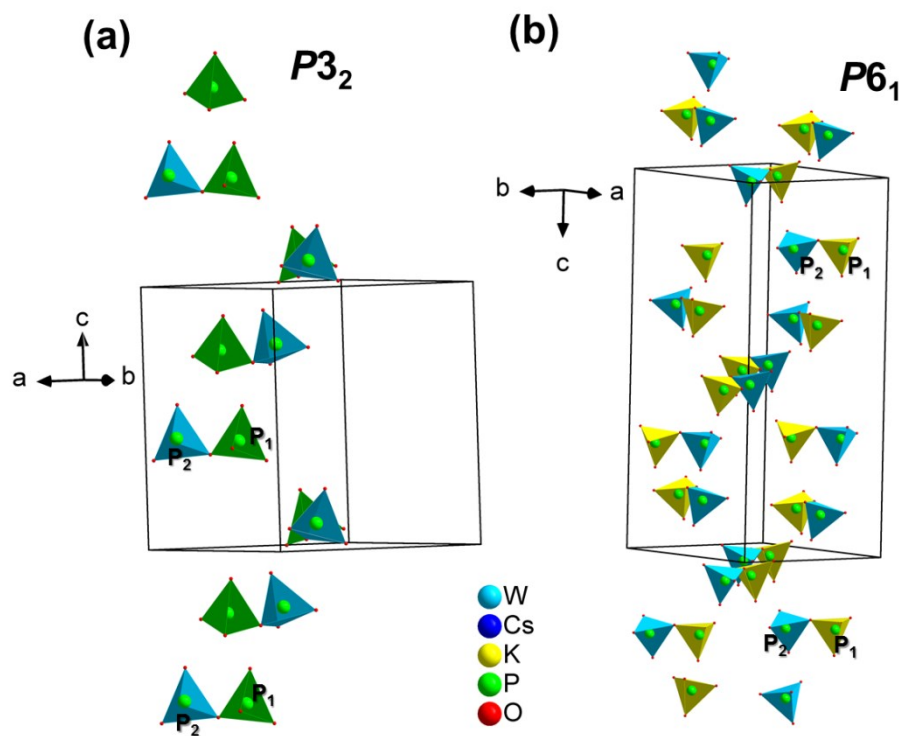

**Figure S5.** Spatial arrangement patterns of the  $\text{PO}_4$  tetrahedra in  $\alpha$ -, and  $\beta$ - $\text{KCsWP}_2\text{O}_9$ .

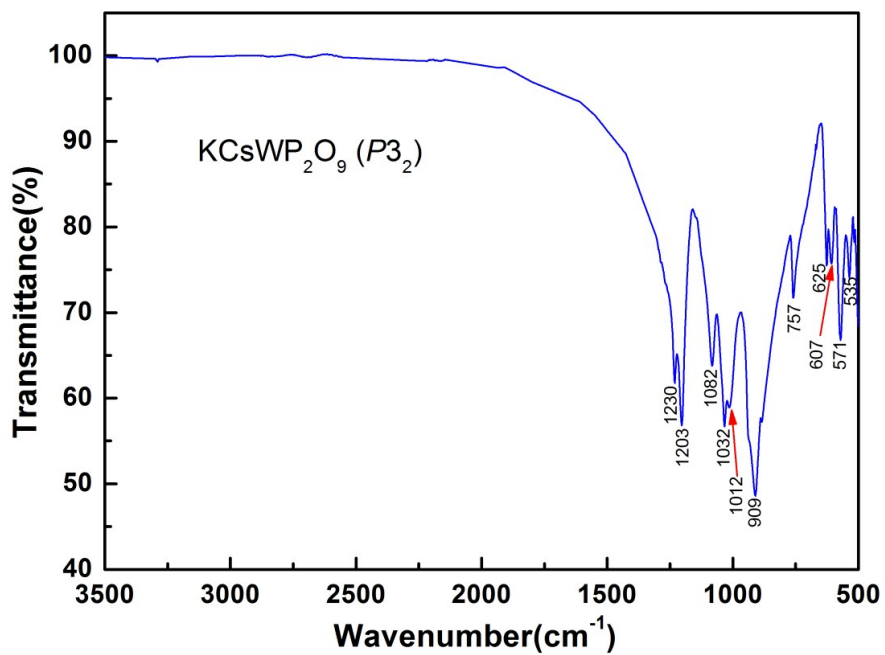

Figure S6. The IR spectrum of  $\alpha\text{-KCsWP}_2\text{O}_9$ .

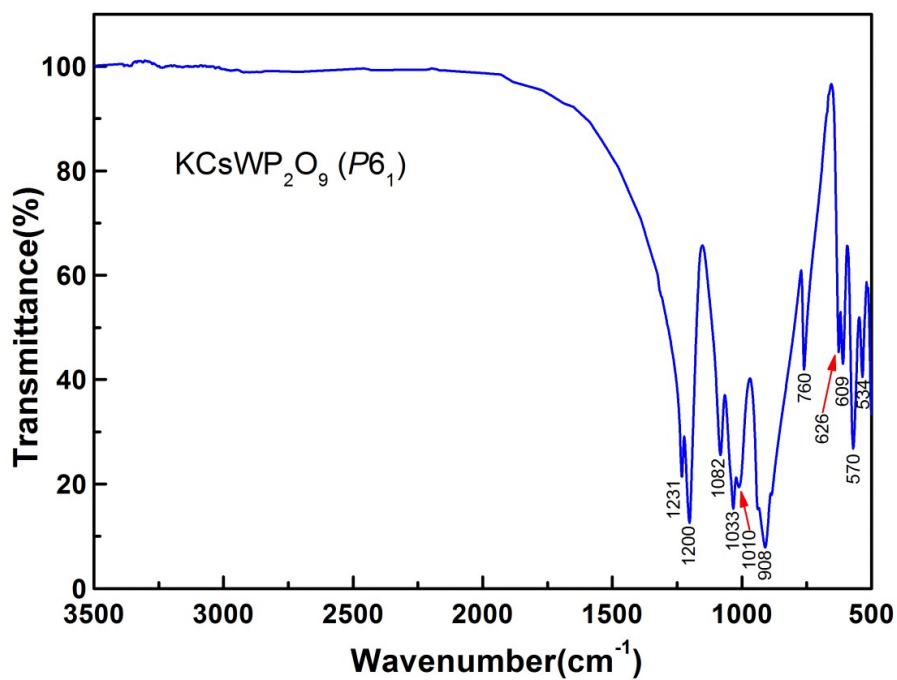

**Figure S7.** The IR spectrum of  $\beta$ -KCsWP<sub>2</sub>O<sub>9</sub>.

**Table S3.** Assignment of observed absorption bands for  $\alpha$ -, and  $\beta$ -KCsWP<sub>2</sub>O<sub>9</sub> in the IR spectra.

| Peaks (cm <sup>-1</sup> )         |                                   | Assignment                                |
|-----------------------------------|-----------------------------------|-------------------------------------------|
| <i>P</i> <sub>3<sub>2</sub></sub> | <i>P</i> <sub>6<sub>1</sub></sub> |                                           |
| 1230, 1205                        | 1231, 1200                        | Asymmetric stretching vibrations of O-P-O |
| 1082, 1032, 1032                  | 1082, 1033, 1010                  | Symmetric stretching vibrations of O-P-O  |
| 909                               | 908                               | Asymmetric vibrations of P-O-P            |
| 757                               | 760                               | Symmetric vibrations of P-O-P             |
| 625, 607, 571, 535                | 626, 609, 570, 534                | Bending vibration of O-P-O                |

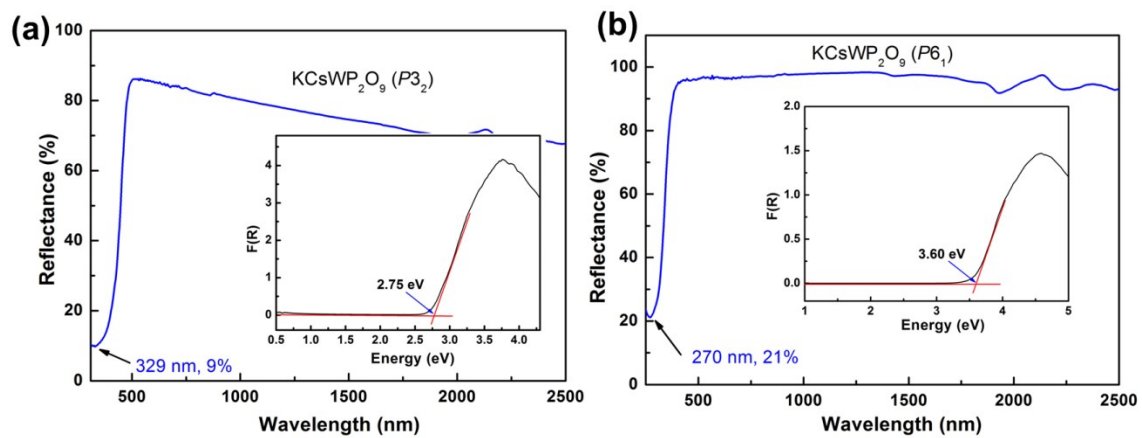

**Figure S8.** UV-Vis-NIR diffuse reflectance spectra of  $\alpha$ - and  $\beta$ - $\text{KCsWP}_2\text{O}_9$ .

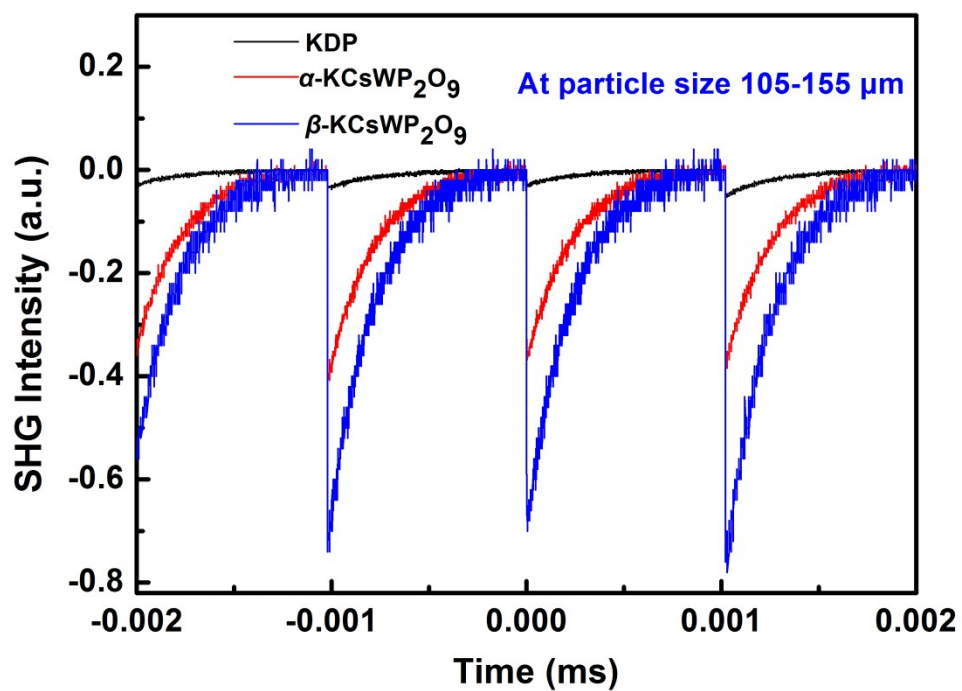

**Figure S9.** Oscilloscope traces of the SHG signals for the powders (105-155  $\mu$ m) for KDP and  $\alpha$ -, and  $\beta$ -KCsWP<sub>2</sub>O<sub>9</sub> (at 1064 nm Q-switched Nd:YAG laser).



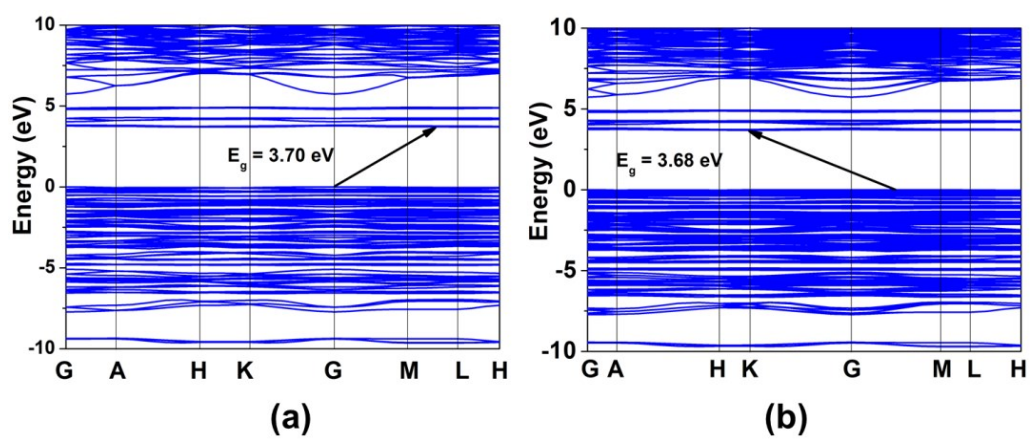

**Figure S10.** Calculated electronic band structures of  $\alpha$ -, and  $\beta$ -KCsWP<sub>2</sub>O<sub>9</sub>.

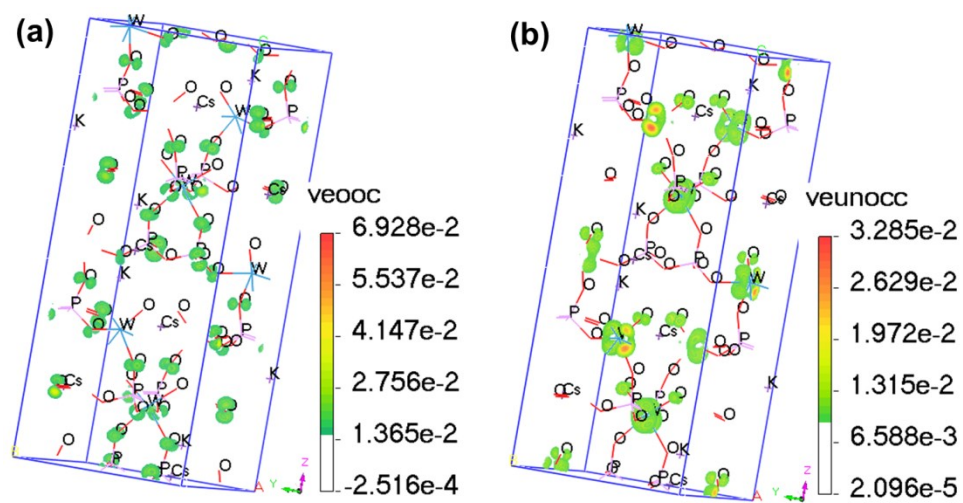

**Figure S11.** The SHG density maps of the VE occupied (a) and VE unoccupied orbitals (b) of  $\beta$ -KCWP<sub>2</sub>O<sub>9</sub>.

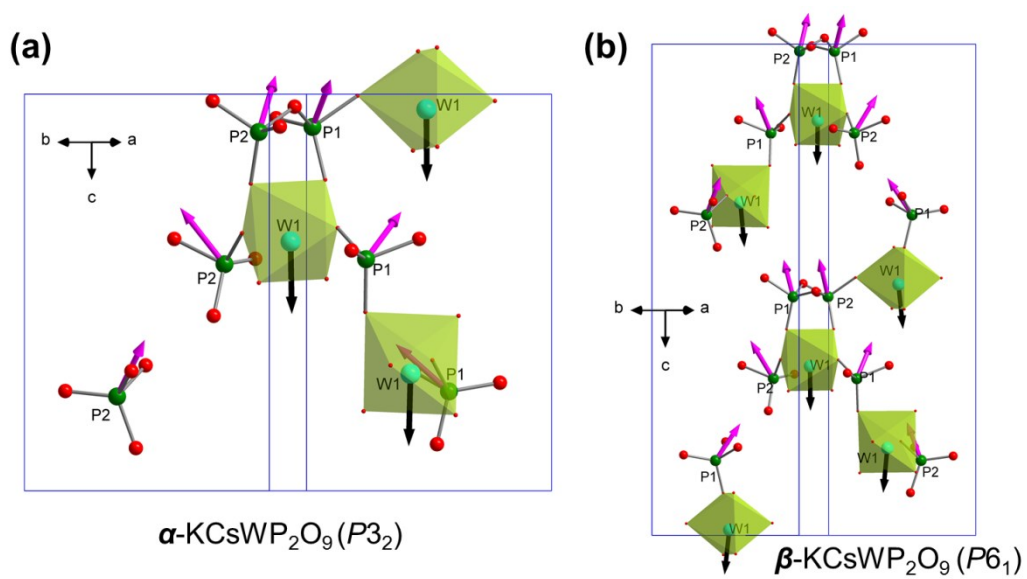

**Figure S12.** Dipole moment directions of the PO<sub>4</sub> and WO<sub>6</sub> polyhedra in KCsWP<sub>2</sub>O<sub>9</sub>, viewed along (111) direction. (The arrows represent the approximate directions of the dipole moments).
